# Supplementary material for: Widespread fear of dengue transmission but poor practices of dengue prevention: A study in the slums of Delhi, India
Source: PubMed Central journal article supplement (PMC5302449; doi:10.1371/journal.pone.0171543), 2017-02-10
Supplement: pone.0171543.s002.pdf [file pone.0171543.s002.pdf]

# ICMR-RSBY Sampling Frame

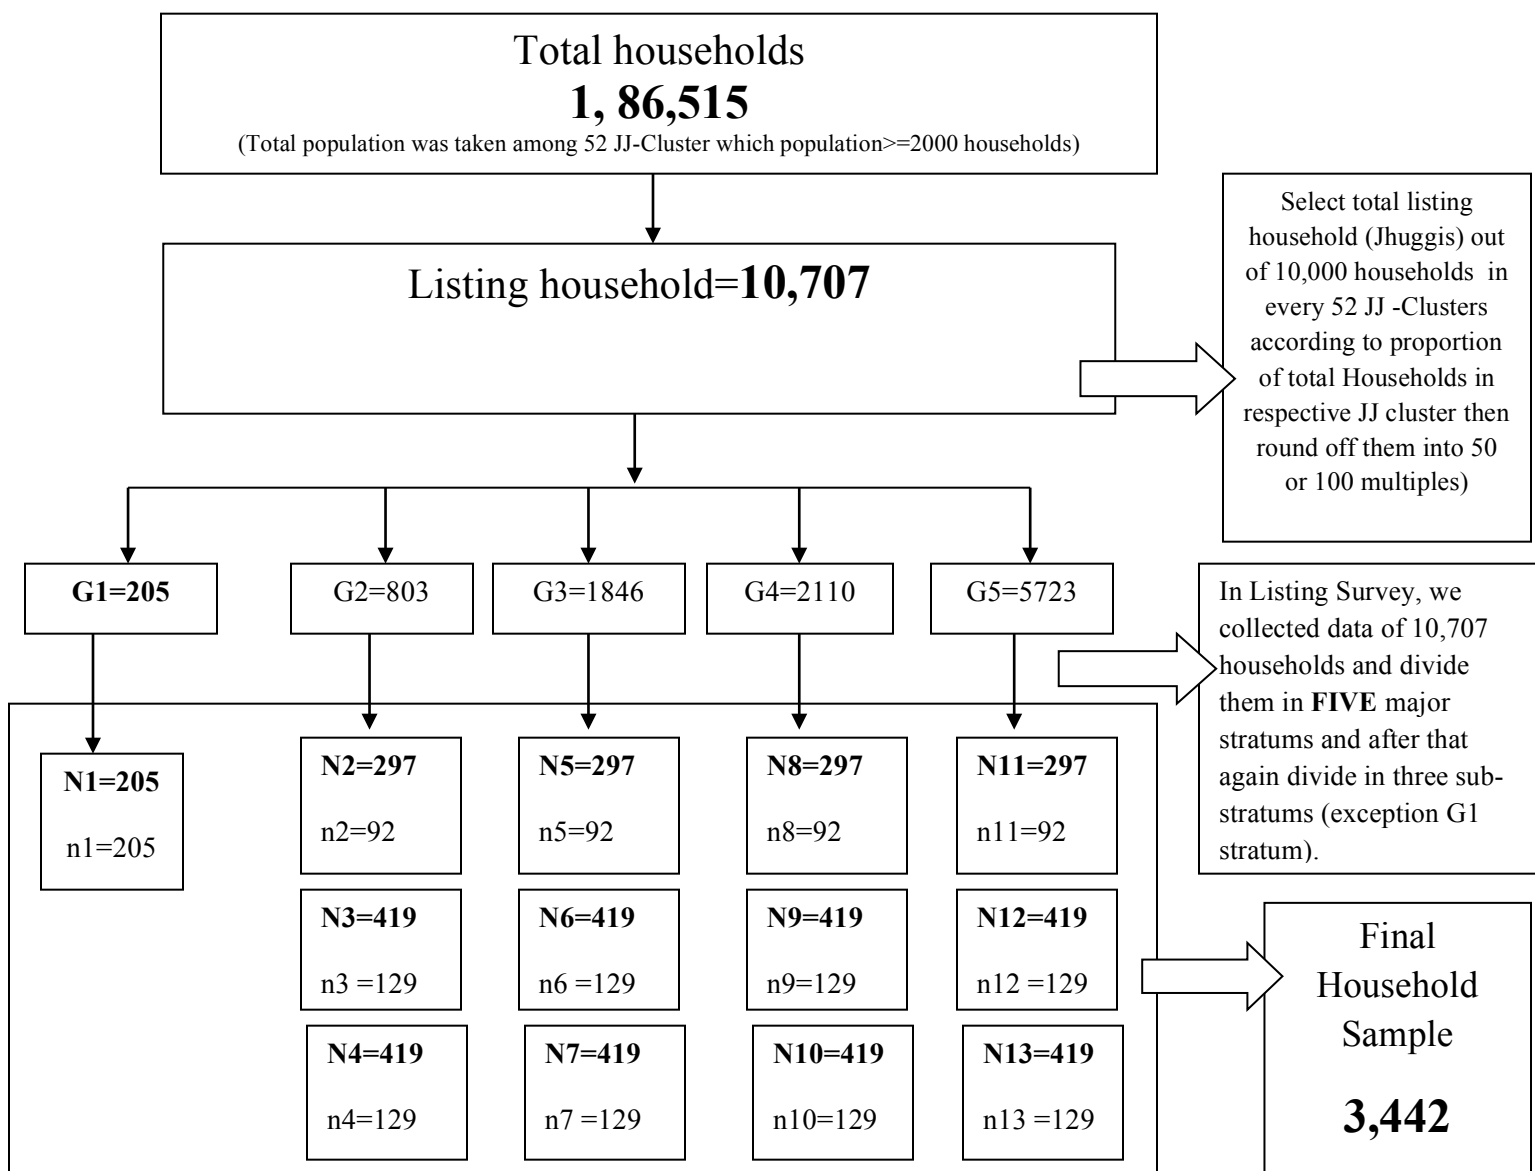

| N=Listing population; n=household sample; SES=Socioeconomic Status |         |        |                                                     |
|--------------------------------------------------------------------|---------|--------|-----------------------------------------------------|
|                                                                    | Listing | Sample |                                                     |
| G1                                                                 | N1      | n1     | Have RSBY Card+Hospitalised+Use Card                |
| G2                                                                 | N2      | n2     | Have RSBY Card+Hospitalised+Don't Use Card+SES1     |
|                                                                    | N3      | n3     | Have RSBY Card+Hospitalised+Don't Use Card+SES2     |
| G3                                                                 | N4      | n4     | Have RSBY Card+Hospitalised+Don't Use Card+SES3     |
|                                                                    | N5      | n5     | Have RSBY Card+Not Hospitalised+Don't Use Card+SES1 |
|                                                                    | N6      | n6     | Have RSBY Card+Not Hospitalised+Don't Use Card+SES2 |
| G4                                                                 | N7      | n7     | Have RSBY Card+Not Hospitalised+Don't Use Card+SES3 |
|                                                                    | N8      | n8     | No RSBY Card+Hospitalised+SES1                      |
|                                                                    | N9      | n9     | No RSBY Card+Hospitalised+SES2                      |
| G5                                                                 | N10     | n10    | No RSBY Card+Hospitalised+SES3                      |
|                                                                    | N11     | n11    | No RSBY Card+Not Hospitalised+SES1                  |
|                                                                    | N12     | n12    | No RSBY Card+Not Hospitalised+SES2                  |
|                                                                    | N13     | n13    | No RSBY Card+Not Hospitalised+SES3                  |
